# Supplementary material
Source: publisher site journal article supplement (https://db.degruyter.com/publication/dbid/ebr/downloadAsset/EBR_EBR%20Art%20and%20Film%20Citation%20Guidelines.pdf)
Supplement: Supplementary file 1 [file EBR_EBR%20Art%20and%20Film%20Citation%20Guidelines.pdf]

## EBR Art Citation Guidelines

Note: Country abbreviations for the following cities don't need to be added: Barcelona, Berlin, Budapest, Cambridge, Chicago, Dresden, Florence, Istanbul, Jerusalem, London, Los Angeles, Madrid, Moscow, New York, Oxford, Paris, Prague, Rome, St. Petersburg, Vatican City, Venice, Vienna, Warsaw.

### 1. Works in Museums/Galleries/Private Collections

Artist [full name], *title*, medium, date, museum/collection, city, country [resp. postal abbr.]

Example:

Francesco Fontebasso, *The Good Samaritan* (oil on canvas, 1759, Tridentine Diocesan Museum, Trento, Italy)

Mary Ascher, *Ruth and Naomi* (lithograph, 1963, Smithsonian American Art Museum, Washington, DC)

Sir John Everett Millais, *Christ in the House of His Parents* (oil on canvas, 1850, Tate Gallery, London)

### 2. Works in Religious Spaces or other Buildings

Title (or subject if untitled), medium, location within building (e.g., apse), date, name of religious building (e.g., church, synagogue, mosque), city, country [resp. postal abbr.]

Example:

*Pharaoh and infant Moses* (fresco on plaster, 244–255 CE, Dura-Europos Synagogue, National Museum of Damascus, Damascus, Syria)

*Anastasis/Harrowing of Hell* (fresco, apse, ca. 1315, Chora Church, Istanbul)

### 3. Manuscripts

Title of MS, date, city, country [resp. postal abbr.], collection MS no., fol. no.

Example:

Millstatt Miscellany (1180–1220, Klagenfurt, Austria, Landesmuseum Kärnten, MS 6.19, fol. 100v [IMA 136040])

Madrid Skylitzes (1140–50, Madrid, Biblioteca Nacional de España, Cod. Vitr. 26–2, fol. 141v)

#### 4. Abbreviations

IMA Index of Medieval Art (<https://theindex.princeton.edu>; ISSN 2642-1836 © 2022 The Trustees of Princeton University, NJ, USA). Citation of all images are by their assigned IMA system numbers.

Example:

IMA 234923

## ***EBR Film Citation Guidelines***

The regular order for information on films is: *Title* (dir. director, year, country/ies of production [abbreviated by ISO 3166-1 alpha-2])

Example:

e.g., *Jesus of Nazareth* (dir. Franco Zeffirelli, 1977, UK/IT)

→ director and year can also be mentioned in the text
